# Supplementary material for: Factors predicting long-term outcomes of percutaneous angioplasty and stenting of the superior mesenteric artery for chronic mesenteric ischemia
Source: Atypon-hosted journal article supplement (doi:10.1024/0301-1526/a000964), 2021-07-07
Supplement: 0301-1526_a000964_esm2.pdf [file 0301-1526_a000964_esm2.pdf]

## Electronic supplementary material

### ESM 2. Pre-interventional imaging modality over the years

| Time period        | Catheter-angiography | DUS | MRA | CTA | Total |
|--------------------|----------------------|-----|-----|-----|-------|
| 1999 - 2001        | 7                    | -   | 2   | -   | 9     |
| 2002 - 2004        | 5                    | -   | 3   | 4   | 12    |
| 2005 - 2007        | -                    | 1   | 2   | 3   | 6     |
| 2008 - 2010        | 1                    | 2   | 2   | 14  | 19    |
| 2011 - 2013        | -                    | -   | 1   | 12  | 13    |
| 2014 - 2016        | -                    | -   | -   | 8   | 8     |
| 2017- end of study | -                    | -   | -   | 9   | 9     |

DUS: duplex ultrasound; MRA: magnetic resonance angiography; CTA: computed tomography angiography.
