# Supplementary material for: Factors predicting long-term outcomes of percutaneous angioplasty and stenting of the superior mesenteric artery for chronic mesenteric ischemia
Source: Atypon-hosted journal article supplement (doi:10.1024/0301-1526/a000964), 2021-07-07
Supplement: 0301-1526_a000964_esm4.pdf [file 0301-1526_a000964_esm4.pdf]

## Electronic supplementary material

### ESM 4. Cause of death in 35 patients

| Cause of death          | n (%)      |
|-------------------------|------------|
| Cardiovascular          | 11 (31.4%) |
| Intestinal ischemia     | 3 (8.6%)   |
| Other gastro-intestinal | 3 (8.6%)   |
| Renal failure           | 4 (11.4%)  |
| Neoplasm                | 4 (11.3%)  |
| Pulmonary               | 3 (8.6%)   |
| Infectious/sepsis       | 3 (8.6%)   |
| Other                   | 4 (11.3%)  |
