# Supplementary material for: Factors predicting long-term outcomes of percutaneous angioplasty and stenting of the superior mesenteric artery for chronic mesenteric ischemia
Source: Atypon-hosted journal article supplement (doi:10.1024/0301-1526/a000964), 2021-07-07
Supplement: 0301-1526_a000964_esm5.pdf [file 0301-1526_a000964_esm5.pdf]

## Electronic supplementary material

### ESM 5. Demographic and Interventional parameters potentially predicting early or late restenosis

| Parameter                   | Hazard Ratio (95% CI) | P-value |
|-----------------------------|-----------------------|---------|
| Age                         | 0.900 (0.554; 1.461)  | 0.6690  |
| Smoking                     | 1.842 (0.786; 4.320)  | 0.16    |
| Arterial hypertension       | 1.006 (0.429; 2.357)  | 0.9889  |
| Hyperlipidemia              | 0.981 (0.422; 2.282)  | 0.9653  |
| Diabetes mellitus           | 0.514 (0.184; 1.434)  | 0.2039  |
| Cardiac comorbidities       | 1.512 (0.648; 3.524)  | 0.3388  |
| Pulmonary comorbidities     | 1.011 (0.340; 3.008)  | 0.9841  |
| Renal insufficiency         | 0.798 (0.259; 2.465)  | 0.6956  |
| Aortic aneurysm             | 0.536 (0.115; 2.486)  | 0.4254  |
| Peripheral vascular disease | 0.861 (0.349; 2.127)  | 0.7459  |
| Ostial/non-ostial stenosis  | 0.403 (0.114; 1.416)  | 0.1564  |
| Stent diameter              | 1.261 (0.501; 3.173)  | 0.6223  |

Age and stent diameter were analyzed as continuous variables.
