# Supplementary material for: Factors predicting long-term outcomes of percutaneous angioplasty and stenting of the superior mesenteric artery for chronic mesenteric ischemia
Source: Atypon-hosted journal article supplement (doi:10.1024/0301-1526/a000964), 2021-07-07
Supplement: 0301-1526_a000964_esm6.pdf [file 0301-1526_a000964_esm6.pdf]

## Electronic supplementary material

**ESM 6.** Overview of technical and short-term outcome after SMA angioplasty and stenting based on recent, high-volume studies

| Author                 | SMA inter-ventions (n) | Technical success (%) | Compli-cations (%) | Initial clinical success (%) | 30-day mortality (%) |
|------------------------|------------------------|-----------------------|--------------------|------------------------------|----------------------|
| AbuRahma et al. [4]    | 54                     | n/a                   | 2                  | 97                           | 2                    |
| Ahanchi et al. [15]    | 92                     | 100                   | 14                 | n/a                          | 0.8                  |
| Cenk Turba et al. [17] | 120                    | 94                    | 6                  | 100                          | n/a                  |
| Chahid et al. [9]      | 11                     | 100                   | 14                 | 100                          | n/a                  |
| Fioole et al. [2]      | 24                     | 93                    | 4                  | 78                           | 0                    |
| Landis et al. [8]      | 34                     | 97                    | 13.8               | 90                           | 6                    |
| Lee et al. [10]        | 26                     | 97.5                  | 6                  | n/a                          | 14                   |
| Zerbib et al. [11]     | 14                     | 92.8                  | n/a                | n/a                          | 14.2                 |
| Haben et al. [18]      | 133                    | 99.2                  | 14.8               | n/a                          | n/a                  |
| Presented study        | 76                     | 98.7                  | 15.7               | 89.4                         | 2.6                  |
