# Supplementary material for: Factors predicting long-term outcomes of percutaneous angioplasty and stenting of the superior mesenteric artery for chronic mesenteric ischemia
Source: Atypon-hosted journal article supplement (doi:10.1024/0301-1526/a000964), 2021-07-07
Supplement: 0301-1526_a000964_esm7.pdf [file 0301-1526_a000964_esm7.pdf]

## Electronic supplementary material

**ESM 7.** Long-term outcome data of SMA angioplasty and stenting based on recent, high volume studies

| Author                 | Mean follow-up (months) | Overall primary clinical success (%) | 1-year survival (%) | 5-year survival (%) |
|------------------------|-------------------------|--------------------------------------|---------------------|---------------------|
| AbuRahma et al. [4]    | 31                      | 59                                   | 85                  | 51                  |
| Ahanchi et al. [15]    | 13.1                    | n/a                                  | 85                  | n/a                 |
| Cenk Turba et al. [17] | 23.3                    | 80.8                                 | n/a                 | 75.9                |
| Fioole et al. [2]      | 25                      | 56                                   | n/a                 | n/a                 |
| Lee et al. [10]        | 32                      | 69                                   | 77                  | 50                  |
| Zerbib et al. [11]     | 14.6                    | 71                                   | 77                  | n/a                 |
| Presented study        | 45.5                    | 70.4                                 | 87.1                | 57.0                |
